# Supplementary material for: Differences in Regional Glucose Metabolism of the Brain Measured with F-18-FDG-PET in Patients with Essential Tremor According to Their Response to Beta-Blockers
Source: PubMed Central journal article supplement — Korean J Radiol. 2015 Aug 21;16(5):967–72. doi: 10.3348/kjr.2015.16.5.967 (PMC4559793; doi:10.3348/kjr.2015.16.5.967), 2015-08-21
Supplement: kjr-16-967-s001.pdf [file kjr-16-967-s001.pdf]

**Supplementary Table 1. Brain Areas with Significantly Decreased Glucose Metabolism in Essential Tremor Patients Compared with Healthy Subjects**

| <b>k<sub>ε</sub></b> | <b>T</b> | <b>Z</b> | <b>x, y, z</b> | <b>Brain Areas</b>                                  |
|----------------------|----------|----------|----------------|-----------------------------------------------------|
| 12556                | 11.12    | 6.30     | -2, -50, 0     | Left Cerebellum, Anterior Lobe, Culmen              |
| 12556                | 9.22     | 5.77     | -46, -50, -12  | Left Temporal Lobe, Fusiform Gyrus, BA 37           |
| 12556                | 9.00     | 5.70     | -52, -48, 22   | Left Temporal Lobe, Suprmarginal Gyrus, BA 40       |
| 12556                | 8.20     | 5.61     | -52, -68, 8    | Left Occipital Lobe, Middle Occipital Gyrus, BA 19  |
| 12556                | 7.79     | 5.28     | 26, 14, 56     | Right Frontal Lobe, Middle Frontal Gyrus, BA 6      |
| 12556                | 7.74     | 5.27     | 40, -44, -18   | Right Temporal Lobe, Fusiform Gyrus, BA 37          |
| 12556                | 7.39     | 5.13     | -36, 6, -18    | Left Temporal Lobe, Superior Temporal Gyrus, BA 38  |
| 12556                | 7.11     | 5.02     | -52, -38, -14  | Left Temporal Lobe, Inferior Temporal Gyrus, BA 20  |
| 12556                | 7.00     | 4.98     | 40, -44, -18   | Right Temporal Lobe, Fusiform Gyrus, BA 37          |
| 12556                | 6.85     | 4.91     | 8, -38, -4     | Right Cerebellum, Anterior Lobe, Culmen             |
| 12556                | 6.80     | 4.89     | 4, -48, 52     | Right Parietal Lobe, Precuneus, BA 7                |
| 12556                | 6.41     | 4.72     | -48, -2, 18    | Left Frontal Lobe, Inferior Frontal Gyrus, BA 44    |
| 12556                | 5.93     | 4.50     | -10, 30, 42    | Left Frontal Lobe, Medial Frontal Gyrus, BA 8       |
| 12556                | 5.81     | 4.44     | -14, -50, 52   | Left Parietal Lobe, Precuneus, BA 7                 |
| 12556                | 5.78     | 4.42     | 6, -76, 22     | Right Occipital Lobe, Cuneus, BA 18                 |
| 855                  | 7.17     | 5.19     | 10, 54, 12     | Right Frontal Lobe, Medial Frontal Gyrus, BA 10     |
| 86                   | 6.46     | 4.74     | 46, -42, -38   | Right Cerebellum, Posterior Lobe, Cerebellar Tonsil |

Height threshold: T = 3.93, uncorrected  $p = 0.001$ ; Extent threshold:  $k = 50$  voxels;  $k_{\epsilon}$ : expected voxels per cluster
